# Supplementary material for: The Wide Spectrum of COVID-19 Clinical Presentation in Children
Source: PubMed Central journal article supplement (PMC7564665; doi:10.3390/jcm9092950), 2020-09-12
Supplement: jcm-09-02950-s001.pdf [file jcm-09-02950-s001.pdf]

Supplemental data for

## The Wide Spectrum of COVID-19 Clinical Presentation in Children

Nadia Nathan <sup>1,2</sup>, Blandine Prevost <sup>1</sup>, Chiara Sileo <sup>3</sup>, Nicolas Richard <sup>1,4</sup>, Laura Berdah <sup>1,4</sup>,  
Guillaume Thouvenin <sup>1,4</sup>, Guillaume Aubertin <sup>1,4</sup>, Thibault Lecarpentier <sup>5</sup>, Aurélie Schnuriger <sup>4,6</sup>,  
Julien Jegard <sup>7</sup>, Isabelle Guellec <sup>7</sup>, Jessica Taytard <sup>1,8</sup> and Harriet Corvol <sup>1,4\*</sup>

<sup>1</sup> Pediatric pulmonology department, APHP Hôpital Trousseau, Sorbonne Université, 75012 Paris, France

<sup>2</sup> Sorbonne Université, Inserm UMR\_S933, Childhood genetic disorders, 75012 Paris, France

<sup>3</sup> Pediatric radiology department, APHP Hôpital Trousseau, Sorbonne Université, 75012 Paris, France

<sup>4</sup> Sorbonne Université, Centre de Recherche Saint-Antoine (CRSA), Inserm UMR\_S938, 75012 Paris, France

<sup>5</sup> Pediatric emergency department, APHP Hôpital Trousseau, Sorbonne Université, 75012 Paris, France

<sup>6</sup> Virology department, APHP Hôpital Trousseau, Sorbonne Université, 75012 Paris, France

<sup>7</sup> Pediatric and neonatal intensive care unit, APHP Hôpital Trousseau, Sorbonne Université, 75012 Paris, France

<sup>8</sup> Sorbonne Université, Inserm UMR\_S1158, Experimental and clinical respiratory neurophysiology, 75013 Paris, France.

\* Correspondence: [harriet.corvol@aphp.fr](mailto:harriet.corvol@aphp.fr)

**Supplemental Figure 1. Age repartition of the included patients.** The patients are represented by one-year intervals of age from 0 to 18 years-old. Each bar represents the number of patients in the one-year interval of age at the time of hospitalization.

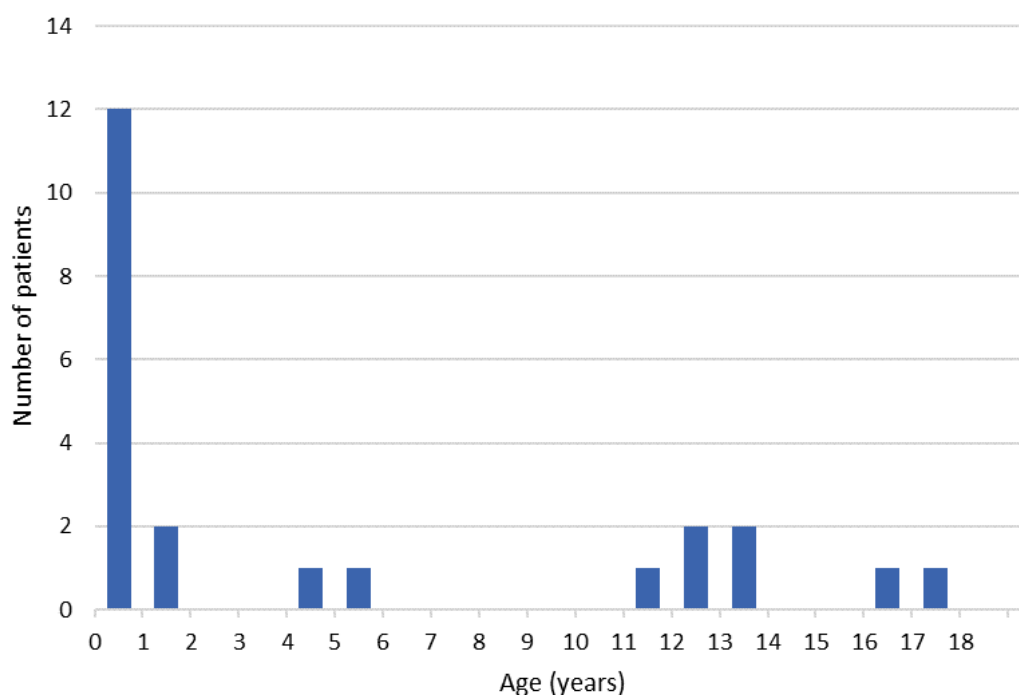

**Supplemental Figure 2. Detailed clinical presentation of 4 patients.** This figure depicts common (central columns) and different (side columns) clinical features for COVID-19 patients with similar presentation and comorbidities at admission. (a) **Girls aged 11 and 5 years with pediatric inflammatory multisystem syndrome temporally associated with SARS-CoV-2 infection (PIMS-TS).** Axial HRCT shows ground-glass opacities and consolidations with bilateral and peripheral distribution for the 11-year-old girl (left). The chest X-ray shows right pleural effusion and retrocardiac consolidation for the 5-year-old girl (right). (b) **Girls aged 17 and 16 with sickle cell disease (SCD) and acute chest syndrome.** The chest X-ray shows a consolidation with a round aspect for the 17-year-old girl (left). CPTA shows a segmental and subsegmental pulmonary embolism (and typical aspect of COVID-19 CT, not shown) for the 16-year-old girl (right).

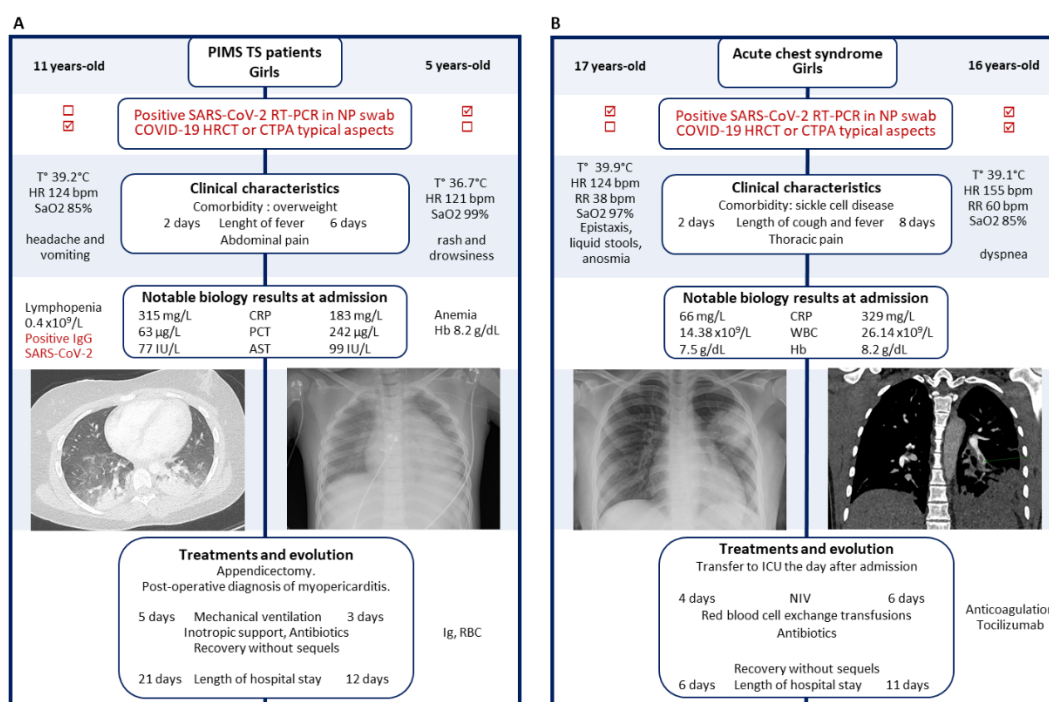

**Abbreviations:** PIMS-TS: pediatric inflammatory multisystem syndrome temporally associated with SARS-CoV-2 infection; RT-PCR: real-time reverse transcription PCR; SARS-CoV-2: severe acute respiratory syndrome coronavirus 2; NP: nasopharyngeal; COVID-19: coronavirus disease 2019; HRCT: high-resolution computed tomography; HR: Heart Rate; CTPA: computed tomography pulmonary angiography; RR: Respiratory rate; WBC: White blood cells; Hb: Hemoglobin; CRP: C-reactive protein; PCT: Procalcitonin; AST: aspartate transaminase; IVIG: Intravenous Immunoglobulins; RBC: Red Blood Cells; ICU: Intensive care unit; NIV: non-invasive ventilation
